# Supplementary material for: Innovative Methods Used in Monitoring COVID-19 in Europe: A Multinational Study
Source: MDPI journal article supplement (doi:10.3390/ijerph20010564), 2022-12-29
Supplement: s1 [file s1]

## SURVEY ON INNOVATIVE METHODS FOR HEALTH MONITORING IN EUROPE

### Digital solutions addressing the covid-19 pandemic

---

### Questionnaire

1. Please, enter your first and last name \_\_\_\_\_

2. Select your country

|  |                        |  |                       |  |                |
|--|------------------------|--|-----------------------|--|----------------|
|  | Austria                |  | Greece                |  | Portugal       |
|  | Belgium                |  | Hungary               |  | Romania        |
|  | Bosnia and Herzegovina |  | Ireland               |  | Serbia         |
|  | Bulgaria               |  | Italy                 |  | Slovakia       |
|  | Croatia                |  | Latvia                |  | Slovenia       |
|  | Cyprus                 |  | Lithuania             |  | Spain          |
|  | Czech Republic         |  | Luxembourg            |  | Spain          |
|  | Denmark                |  | Malta                 |  | Sweden         |
|  | Estonia                |  | Moldova (Republic of) |  | Switzerland    |
|  | Finland                |  | Netherlands           |  | United Kingdom |
|  | France                 |  | Norway                |  |                |
|  | Germany                |  | Poland                |  |                |

3. Enter your e-mail address \_\_\_\_\_

## Innovative solutions and digital tools implemented in your country

1. Which digital solutions addressing the covid-19 pandemic have been implemented in your country? Please, provide information on all digital solutions implemented in your country.

A. Digital tools used to monitor the spread of the coronavirus (e.g., national contact tracing and warning apps)

- If guidelines or best practices on digital tools are available in your country, please list the documents and/or links related to the tool(s): \_\_\_\_\_
- What is the uptake rate of the tool(s)? \_\_\_\_\_
- Have measures been adopted to evaluate the impact of the digital tool(s) (e.g., user surveys)? If 'yes', please specify the measures \_\_\_\_\_
- Which are the target groups of the tool(s) (e.g., general population, healthcare workers, patients)? \_\_\_\_\_

B. Digital tools used to research and develop diagnostics and teleconsultations

- If guidelines or best practices on digital tools are available in your country, please list the documents and/or links related to the tool(s): \_\_\_\_\_
- What is the uptake rate of the tool? \_\_\_\_\_
- Have measures been adopted to evaluate the impact of the digital tool(s) (e.g., user surveys)? If 'yes', please specify the measures \_\_\_\_\_
- Which are the target groups of the tool(s) (e.g., general population, healthcare workers, patients)? \_\_\_\_\_

C. Digital tools/ online platforms used to monitor vaccination coverage levels/vaccine uptake

- If guidelines or best practices on digital tools are available in your country, please list documents and/or links related to the tool(s): \_\_\_\_\_
- What is the uptake rate of the tool? \_\_\_\_\_
- Have measures been adopted to evaluate the impact of the digital tool(s) (e.g., user surveys)? If 'yes', please specify the measures \_\_\_\_\_
- Which are the target groups of the tool(s) (e.g., general population, healthcare workers, patients)? \_\_\_\_\_

D. Online platforms fighting disinformation, screening for food and non-food products with alleged healing or protective effects related to the coronavirus (e.g., Ebay, Facebook, Google, Microsoft)

Name of the platforms and/or links \_\_\_\_\_

### Algorithms (artificial intelligence)

1. Are specific algorithms (artificial intelligence) available in your country to detect patterns in the spread of the coronavirus (e.g., supercomputers)? If 'yes', please provide the title of the document(s) and/or link.

- ☐ Yes \_\_\_\_\_
- ☐ No
- ☐ I don't know/not aware

### Legislative and ethical aspects

1. Are there information on legislative and ethical aspects related to the use of digital solutions addressing the covid-19 pandemic in your country (e.g., guidelines, reports)? If 'yes', please provide the title of the document(s) and/or link.

- ☐ Yes \_\_\_\_\_
- ☐ No
- ☐ I don't know/not aware

### Comments

1. Do you have further information or comments about the implementation of digital tools and innovative solutions in your country? \_\_\_\_\_
